# Supplementary material
Source: PubMed Central journal article supplement (PMC5364944)
Supplement: am7b02765_si_001.pdf [file am7b02765_si_001.pdf]

## Supporting Information

### **Preparation of Partially Poisoned Alkanethiolate-Capped Platinum Nanoparticles for Hydrogenation of Activated Terminal Alkynes**

**Khin Aye San, Vivian Chen, and Young-Seok Shon\***

*Department of Chemistry and Biochemistry, California State University, Long Beach. 1250 Bellflower Blvd. Long Beach, CA 90840. \*Email: [ys.shon@csulb.edu](mailto:ys.shon@csulb.edu).*

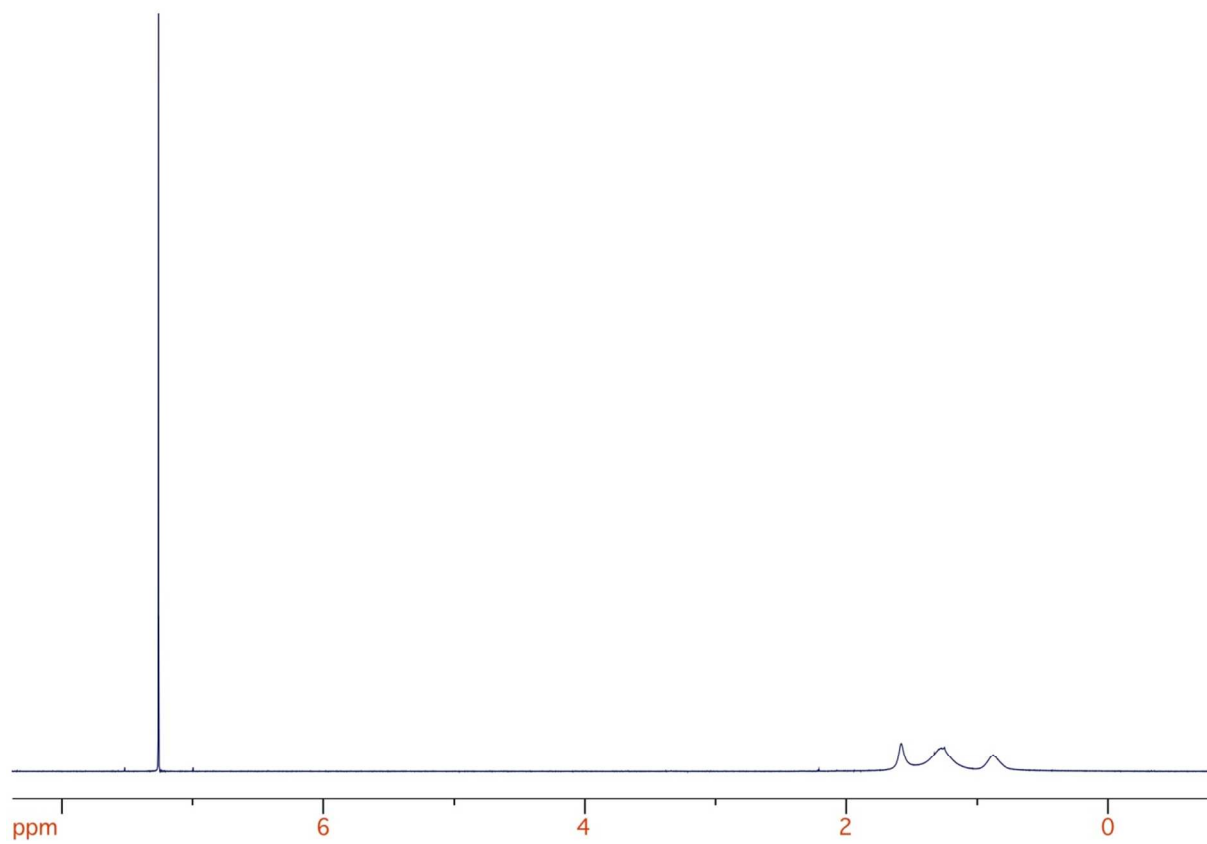

**Figure S1.**  $^1\text{H}$  NMR spectrum of Pt nanoparticles synthesized from octanethiol ligand.

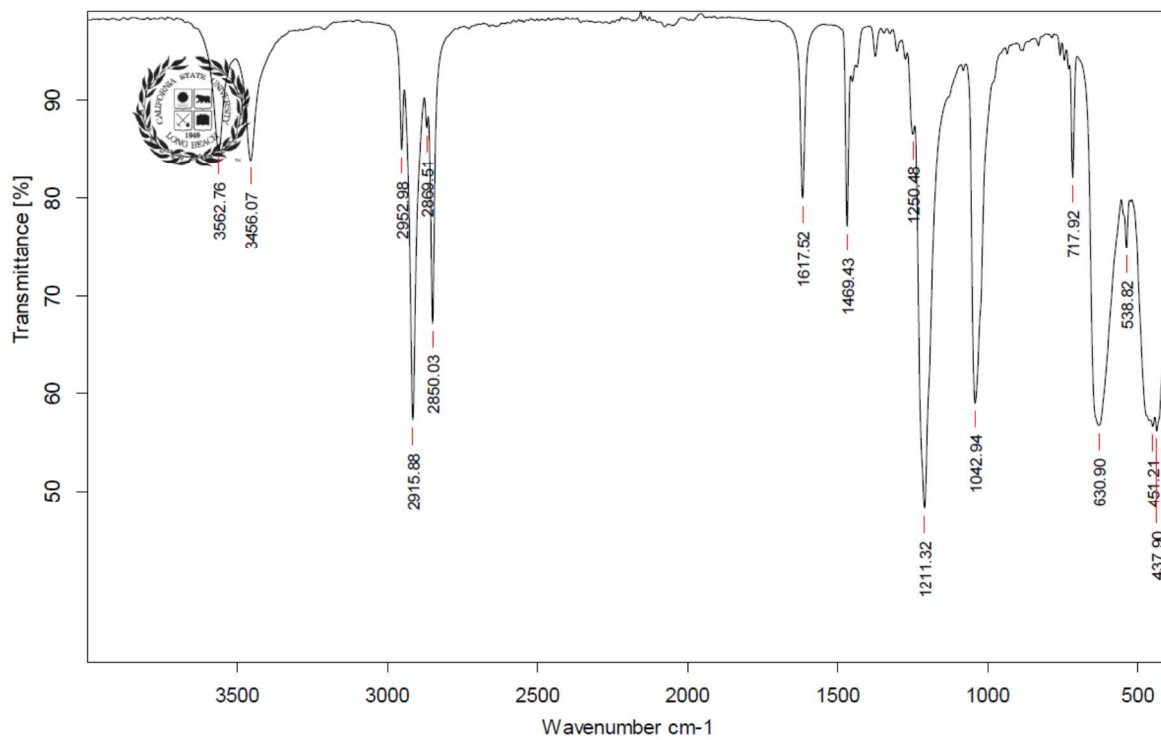

Figure S2. IR spectrum of sodium S-dodecylthiosulfate ligand.

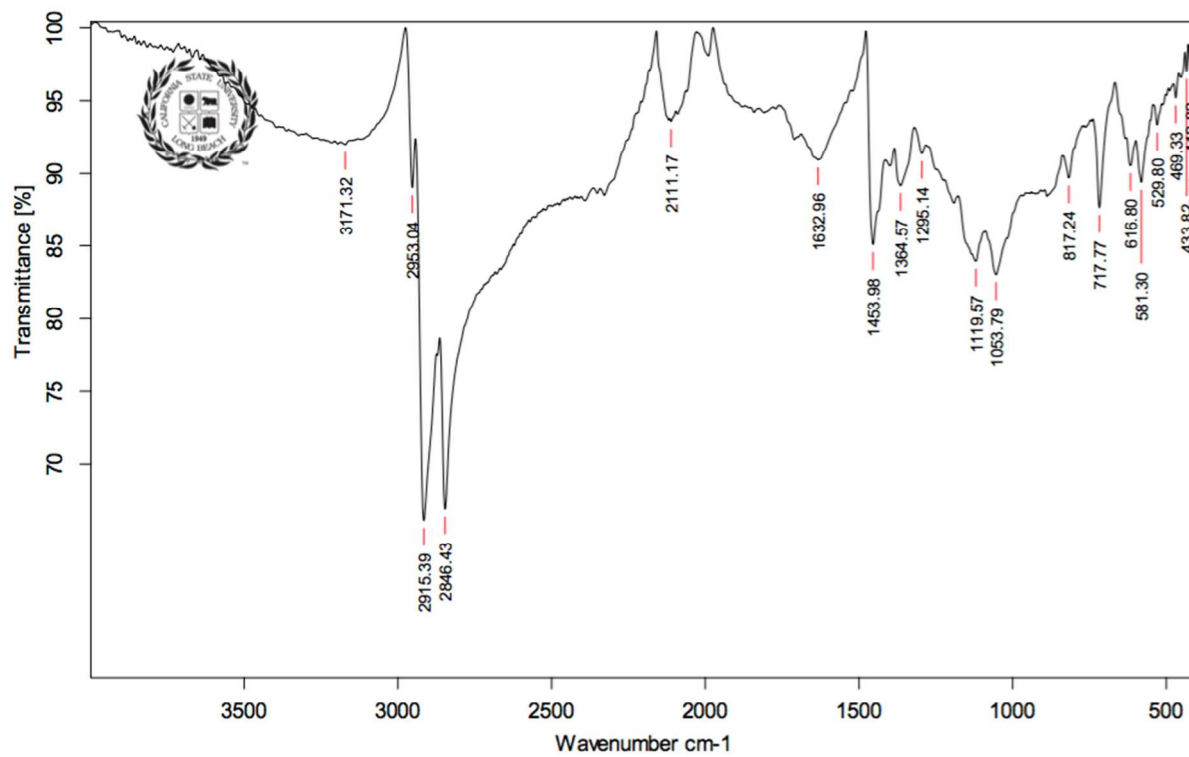

Figure S3. IR spectrum of the Pt nanoparticles generated from sodium S-dodecylthiosulfate.
